# Supplementary material for: The Al(iii)-based polydentate chelate complex catalyzed cycloaddition of carbon dioxide and epoxides: synthetic optimization and mechanistic study
Source: Royal Society of Chemistry journal article supplement (doi:10.1039/d2re00196a), 2022-01-01
Supplement: d2re00196a1.pdf [file d2re00196a1.pdf]

## Supporting Information

### **The Al(III)-Based Polydentate chelate Complex Catalyzed Cycloaddition of Carbon Dioxide and Epoxides: Synthetic Optimization and Mechanistic Study**

**Hong-Qing Fu<sup>1</sup>, Haifang Mao<sup>1\*</sup>, Chaoyang Wang<sup>1</sup>, Kun Yin<sup>2</sup>, Miaomiao Jin<sup>1</sup>,  
Zhenbiao Dong<sup>1</sup>, Yun Zhao<sup>1</sup>, Jibo Liu<sup>1\*</sup>**

*1. School of chemical engineering, Shanghai institute of technology, Shanghai 201418, China*

*2. Anhui Provincial Key Laboratory for Degradation and Monitoring of Pollution of the Environment, School of Chemistry & Materials Engineering, Fuyang Normal University, 100 West Qinghe Road, Fuyang, Anhui, 236037, China.*

## Experiment

### The detail procedure for Figure 4

The topical procedure for Figure 4 as following: Propylene oxide (1.4 mL, 20 mmol), catalyst (0.0938 g, 0.2mmol) and 10 mL (DMF) were added to a 50mL stainless steel autoclave which equipped with a mechanical stirrer. The reactor was kept connected to a CO<sub>2</sub> tank to keep the 2 MPa CO<sub>2</sub> pressure. The reaction mixture was heated to 120 °C and kept stirring for 8 hours. After the reaction, the reactor was cooled in an ice water for 30 minutes and then slowly release excess CO<sub>2</sub>. (A) To investigate the influence of CO<sub>2</sub> pressure, the pressure of CO<sub>2</sub> was adjusted to 0.1 MPa(balloon), 0.5 MPa, 1.0 MPa, 1.5 MPa, 2.0 MPa and 2.5 MPa respectively under the other conditions unchanged. (B) Under the topical condition, the product was detected after stirring for 2 h, 4 h, 6 h, 8 h, 10 h, and 12 h respectively to investigate the product generation with the reaction time extending. (C) The reaction was processed at 80 °C, 100 °C, 120 °C and 140 °C respectively to test the influence of temperature for the cyclic addition reaction. (D) The PO/catalyst ratio (200:1, 100:1, 50:1, 25:1 and 10:1) was involving to investigate the influence of catalyst amounts.

## Supporting Figures

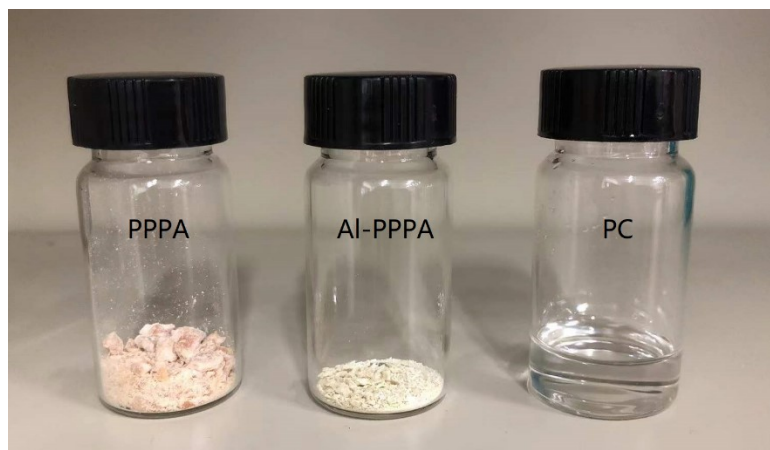

**Figure S1.** Physical state of ligand PPPA, catalyst Al-PPPA and product PC

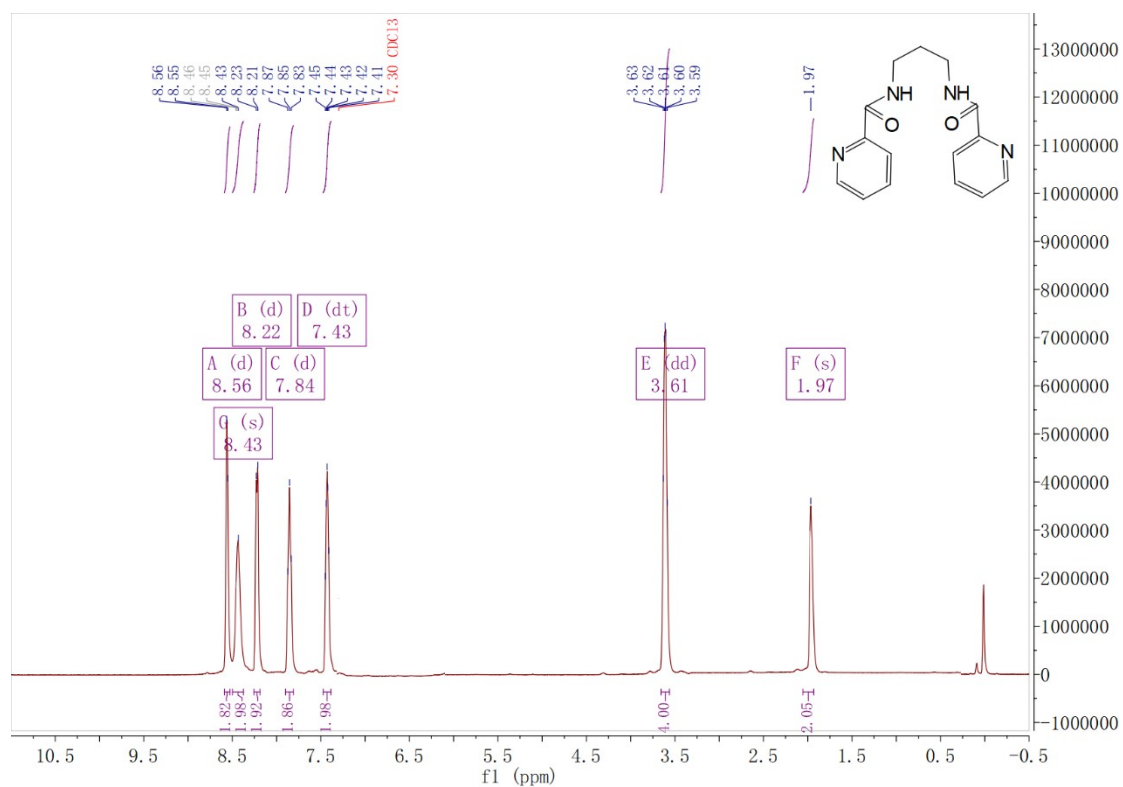

**Figure S2.**  $^1\text{H}$  NMR spectrum of ligand PPPA

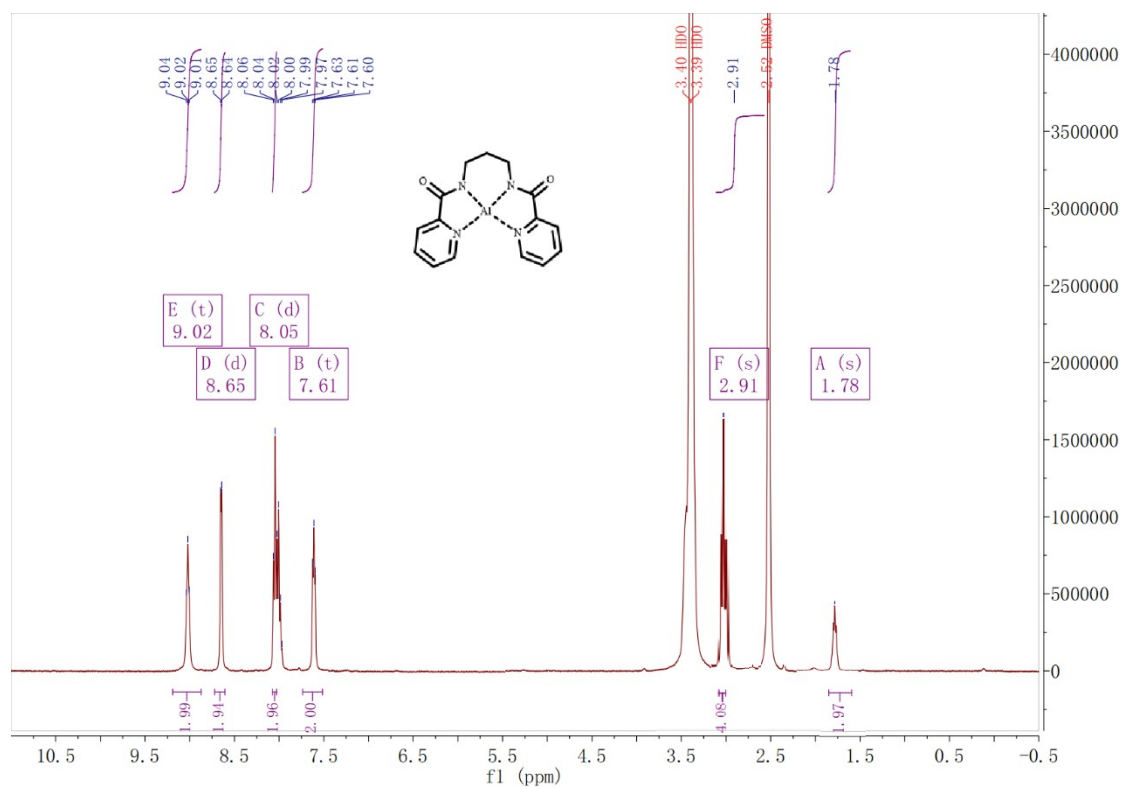

**Figure S3.**  $^1\text{H}$  NMR spectrum of catalyst Al-PPPA

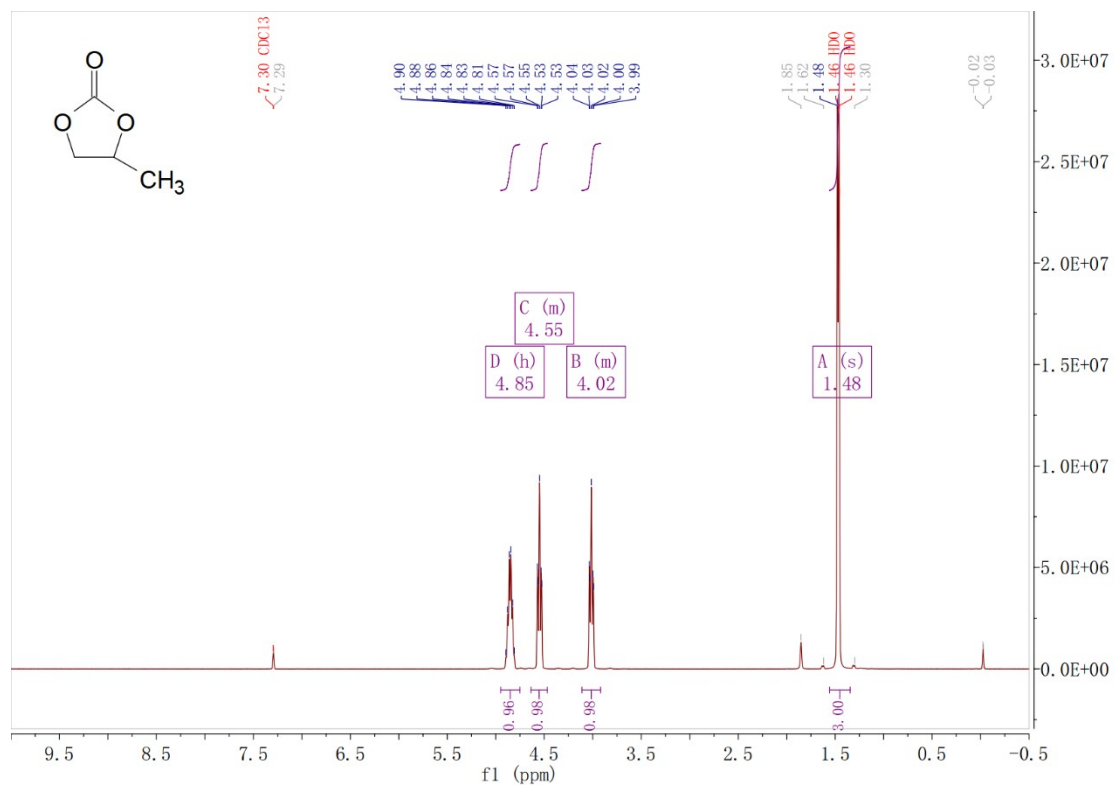

**Figure S4.** <sup>1</sup>H NMR spectrum of product PC

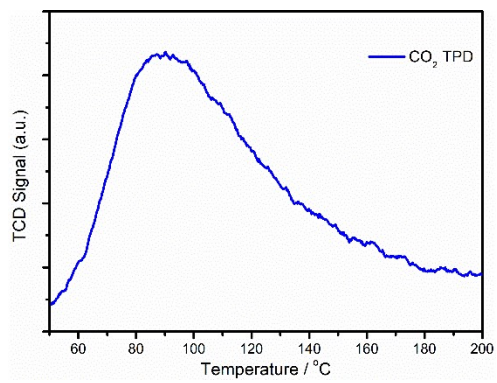

**Fig.S5** CO<sub>2</sub>-TPD of representative polymer catalysts.

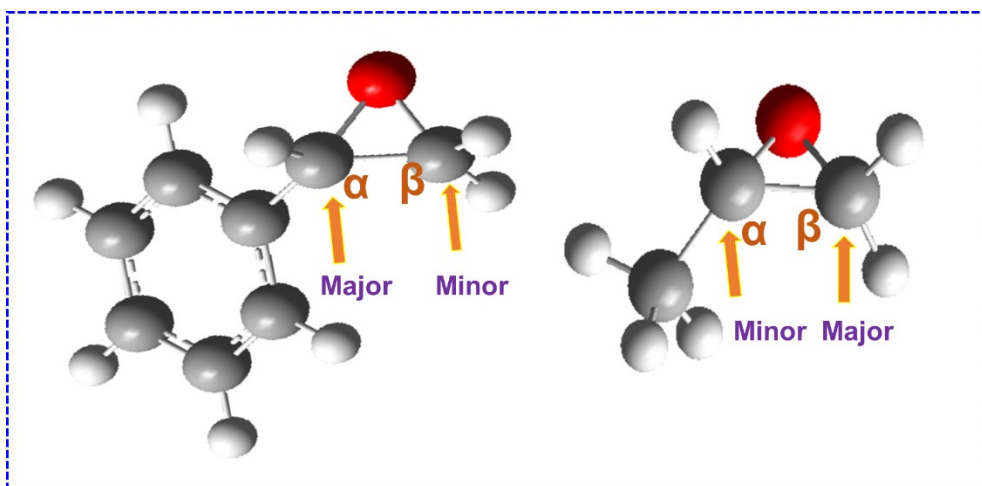

**Fig. S6** Difference in Nucleophilic Ring-Opening between Styrene Oxide and Propylene Oxide



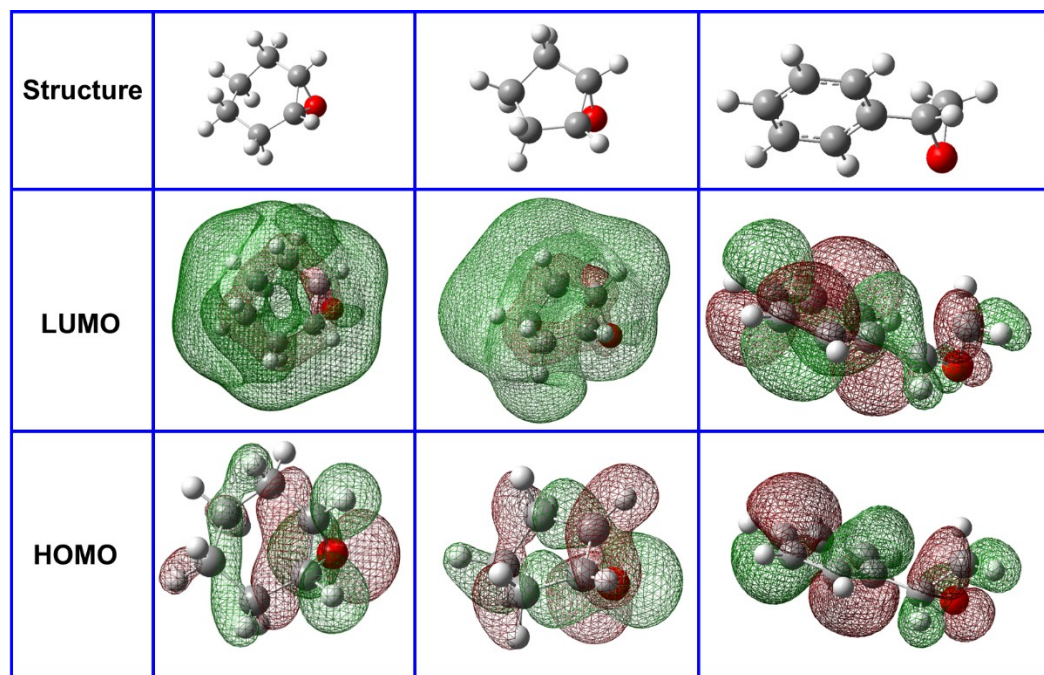

**Fig. S7** The calculated the electron cloud density of styrene oxide, cyclopentane oxide and cyclohexene oxide.

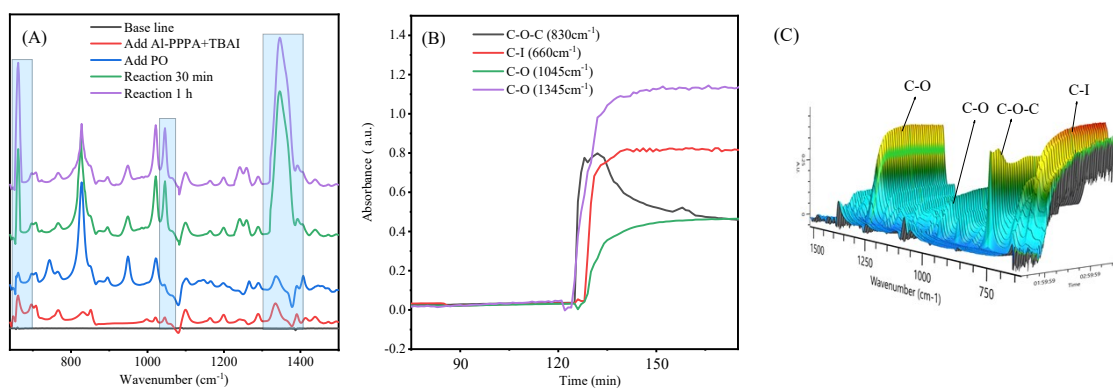

**Fig.S8** *In-situ* ATR-IR monitoring of ring opening process of PO: (a) overall spectra during ring opening process; (b) IR profile of PO (black) and ring open intermediate (red, green, purple); (c) 3D ATR-IR variation diagram during PO ring opening.

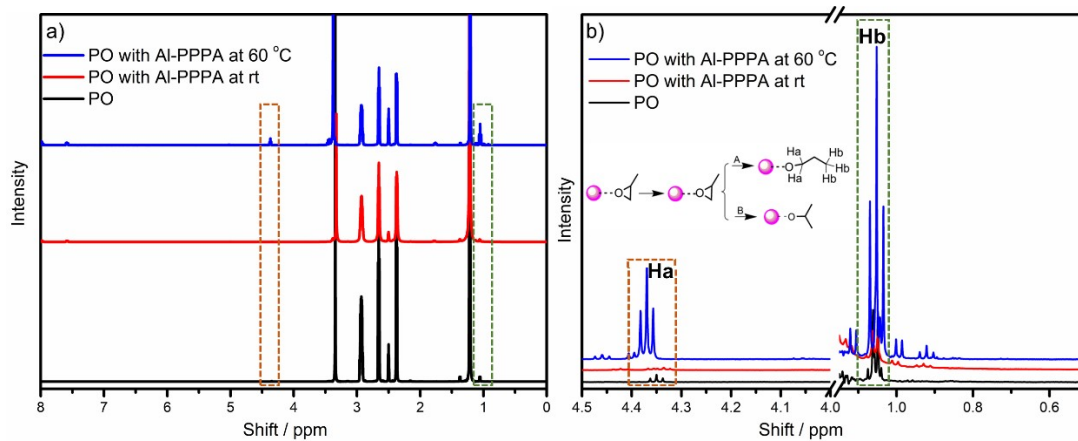

**Fig.S9** The  $^1\text{H}$  NMR spectra of PO, PO with Al-PPPA at room temperature and PO with Al-PPPA at 60 °C.
